# Supplementary material for: Nuclease genes occupy boundaries of genetic exchange between bacteriophages
Source: PubMed Central journal article supplement (PMC10055350; doi:10.1101/2023.03.23.533998), 2023-03-23
Supplement: media-2.pdf [file media-2.pdf]

Table S1) *Vibrio cholerae* and ICP1 Isolates used in this study  
 Accession information for genomes of *Vibrio cholerae* and ICP1 references used throughout this study

| <b>Strain</b>                                | <b>Accession</b>   | <b>Genome Citation</b>     |
|----------------------------------------------|--------------------|----------------------------|
| <i>Vibrio cholerae</i> E7946                 | CP024162, CP024163 | Camilli, A. 2017           |
| ICP1 1992_Ind_M4                             | MW794141           | Boyd et al., 2021          |
| ICP1 2001_Dha_0                              | HQ641347           | Seed et al., 2011          |
| ICP1 2001_Dha_A                              | HQ641353           | Seed et al., 2011          |
| ICP1 2003_Dha_A                              | MW794140           | Boyd et al., 2021          |
| ICP1 2004_Dha_A                              | HQ641354           | Seed et al., 2011          |
| ICP1 2005_Dha_A                              | HQ641352           | Seed et al., 2011          |
| ICP1 2006_Dha_A                              | HQ641351           | Seed et al., 2011          |
| ICP1 2006_Dha_B                              | HQ641350           | Seed et al., 2011          |
| ICP1 2006_Dha_C                              | HQ641349           | Seed et al., 2011          |
| ICP1 2006_Dha_D                              | HQ641348           | Seed et al., 2011          |
| ICP1 2006_Dha_E                              | MH310934           | Angermeyer et al., 2018    |
| ICP1 2006_Dha_E $\Delta$ CR_ $\Delta$ Cas2_3 | N/A                | McKitterick and Seed, 2018 |
| ICP1 2011_Dha_A                              | MH310933           | Angermeyer et al., 2018    |
| ICP1 2011_Dha_B                              | MH310935           | Angermeyer et al., 2018    |
| ICP1 2012_Ind_A                              | MH310936           | Angermeyer et al., 2018    |
| ICP1 2015_Dha_A                              | MW794150           | Boyd et al., 2021          |
| ICP1 2016_Dha_A                              | MW794151           | LeGault et al., 2021       |
| ICP1 2017_Dha_A                              | MW794152           | LeGault et al., 2021       |
| ICP1 2017_Dha_AA                             | MW794153           | LeGault et al., 2021       |
| ICP1 2017_Dha_AB                             | MW794154           | LeGault et al., 2021       |
| ICP1 2017_Dha_AC                             | MW794155           | LeGault et al., 2021       |
| ICP1 2017_Dha_AD                             | MW794156           | LeGault et al., 2021       |
| ICP1 2017_Dha_AE                             | MW794157           | LeGault et al., 2021       |
| ICP1 2017_Dha_B                              | MW794158           | LeGault et al., 2021       |
| ICP1 2017_Dha_C                              | MW794159           | LeGault et al., 2021       |
| ICP1 2017_Dha_D                              | MW794160           | LeGault et al., 2021       |
| ICP1 2017_Dha_E                              | MW794161           | LeGault et al., 2021       |
| ICP1 2017_Dha_F                              | MN419153           | LeGault et al., 2021       |
| ICP1 2017_Dha_N                              | MW794162           | LeGault et al., 2021       |
| ICP1 2017_Dha_O                              | MW794163           | LeGault et al., 2021       |
| ICP1 2017_Dha_P                              | MW794164           | LeGault et al., 2021       |
| ICP1 2017_Dha_R                              | MW794165           | LeGault et al., 2021       |
| ICP1 2017_Dha_S                              | MW794166           | LeGault et al., 2021       |
| ICP1 2017_Dha_V                              | MW794167           | LeGault et al., 2021       |

|                   |          |                      |
|-------------------|----------|----------------------|
| ICP1 2017_Dha_W   | MW794168 | LeGault et al., 2021 |
| ICP1 2017_Dha_X   | MW794169 | LeGault et al., 2021 |
| ICP1 2017_Dha_Y   | MW794170 | LeGault et al., 2021 |
| ICP1 2017_Dha_Z   | MW794171 | LeGault et al., 2021 |
| ICP1 2017_DRC_106 | MW794142 | Alam et al., 2022    |
| ICP1 2017_DRC_32  | MW794143 | Alam et al., 2022    |
| ICP1 2017_DRC_48  | MW794144 | Alam et al., 2022    |
| ICP1 2017_DRC_55  | MW794145 | Alam et al., 2022    |
| ICP1 2017_DRC_72  | MW794146 | Alam et al., 2022    |
| ICP1 2017_DRC_74  | MW794147 | Alam et al., 2022    |
| ICP1 2017_DRC_82  | MW794148 | Alam et al., 2022    |
| ICP1 2017_DRC_87  | MW794149 | Alam et al., 2022    |
| ICP1 2017_Mat_H   | MN419153 | LeGault et al., 2021 |
| ICP1 2017_Mat_I   | MW794172 | LeGault et al., 2021 |
| ICP1 2017_Mat_K   | MW794173 | LeGault et al., 2021 |
| ICP1 2018_Mat_001 | MW794174 | LeGault et al., 2021 |
| ICP1 2018_Mat_002 | MW794175 | LeGault et al., 2021 |
| ICP1 2018_Mat_004 | MW794176 | LeGault et al., 2021 |
| ICP1 2018_Mat_159 | MW794177 | LeGault et al., 2021 |
| ICP1 2018_Mat_160 | MW794178 | LeGault et al., 2021 |
| ICP1 2018_Mat_164 | MW794179 | LeGault et al., 2021 |
| ICP1 2018_Mat_166 | MW794180 | LeGault et al., 2021 |
| ICP1 2018_Mat_167 | MW794181 | LeGault et al., 2021 |
| ICP1 2018_Mat_170 | MW794182 | LeGault et al., 2021 |
| ICP1 2018_Mat_B   | MW794183 | LeGault et al., 2021 |
| ICP1 2019_Dha_007 | MW794184 | LeGault et al., 2021 |
| ICP1 2019_Dha_G   | MW794185 | LeGault et al., 2021 |
| ICP1 2019_Dha_H   | MW794186 | LeGault et al., 2021 |
| ICP1 2019_Dha_I   | MW794187 | LeGault et al., 2021 |
| ICP1 2019_Mat_005 | MW794188 | LeGault et al., 2021 |
| ICP1 2019_Mat_B   | MW794189 | LeGault et al., 2021 |
| ICP1 2019_Mat_C   | MW794190 | LeGault et al., 2021 |
| ICP1 2019_Mat_D   | MW794191 | LeGault et al., 2021 |
| ICP1 2019_Mat_E   | MW794192 | LeGault et al., 2021 |

Table S2) Other organisms referenced in this study  
The accession numbers and shorthand notation for all strains referred to in the study.

| Accession | Shortened name <sup>a</sup> | Common name                         | Host                           | Genome Citation      |
|-----------|-----------------------------|-------------------------------------|--------------------------------|----------------------|
| AP014858  | RYC                         | Vibrio phage RYC                    | <i>Vibrio coralliilyticus</i>  | Ramphul et al. 2017  |
| HQ316579  | Helene                      | Vibrio phage helene 12B3            | <i>Vibrio splendidus</i>       | NA <sup>b</sup>      |
| HQ634156  | PWH3a-P1                    | Vibrio phage PWH3a-P1               | <i>Vibrio natriegens</i>       | NA                   |
| HQ634195  | Eugene                      | Vibrio phage eugene 12A10           | <i>Vibrio spp.</i>             | NA                   |
| KX507046  | S4-7                        | Vibrio phage S4-7                   | <i>Vibrio anguillarum</i>      | NA                   |
| NC_047839 | SL20                        | Pseudoalteromonas phage SL20        | <i>Pseudoalteromonas spp.</i>  | NA                   |
| NC_048769 | 2_L372D                     | Aeromonas phage 2-L372D             | <i>Aeromonas hydrophila</i>    | NA                   |
| NC_048770 | 2_L372X                     | Aeromonas phage 2-L372X             | <i>Aeromonas hydrophila</i>    | NA                   |
| NC_048771 | 4_L372D                     | Aeromonas phage 4_L372D             | <i>Aeromonas hydrophila</i>    | NA                   |
| NC_048772 | 4_L372XY                    | Aeromonas phage 4_L372XY            | <i>Aeromonas hydrophila</i>    | NA                   |
| MG592529  | 1.161.C5                    | Vibrio phage 1.161.O_10N.261.48.C5  | <i>Vibrio lentus</i>           | Kauffman et al. 2018 |
| MG592562  | 1.191.C6                    | Vibrio phage 1.193.O_10N.286.52.C6  | <i>Vibrio splendidus</i>       | Kauffman et al. 2018 |
| MG592473  | 1.101.C6                    | Vibrio phage 1.101.O_10N.261.45.C6  | <i>Enterovibrio norvegicus</i> | Kauffman et al. 2018 |
| MG592553  | 1.187.F1                    | Vibrio phage 1.187.O_10N.286.49.F1  | <i>Vibrio splendidus</i>       | Kauffman et al. 2018 |
| AP018813  | T2                          | Enterobacteria phage T2             | <i>Escherichia coli</i>        | Akiyama et al. 2018  |
| NC_000866 | T4                          | Enterobacteria phage T4             | <i>Escherichia coli</i>        | Miller et al. 2003   |
| NC_020843 | 11895-B1                    | Vibrio phage 11895-B1               | <i>Vibrio spp.</i>             | NA                   |
| NC_025436 | 1/4                         | Shewanella sp. phage 1/4            | <i>Shewanella spp.</i>         | Senčilo et al. 2015  |
| NC_025470 | 1/40                        | Shewanella sp. phage 1/40           | <i>Shewanella spp.</i>         | Senčilo et al. 2015  |
| NC_029057 | qdv001                      | Vibrio phage qdv001                 | <i>Vibrio spp.</i>             | NA                   |
| MK719750  | Barba31A                    | Rheinheimera phage vB_RspM_Barba31A | <i>Rheinheimera spp.</i>       | Nilson et al. 2019   |
| MK719708  | Barba4S                     | Rheinheimera phage vB_RspM_Barba4S  | <i>Rheinheimera spp.</i>       | Nilson et al. 2019   |
| NC_030934 | PsyM_Kil1                   | Pseudomonas phage vB_PsyM_KIL1      | <i>Pseudomonas syringae</i>    | Rombouts et al. 2016 |
| NC_052657 | Muut                        | Escherichia phage muut              | <i>Escherichia coli</i>        | Olsen et al. 2020    |

|                    |                         |                                                                            |                         |                    |
|--------------------|-------------------------|----------------------------------------------------------------------------|-------------------------|--------------------|
| MN850601           | Inny                    | Escherichia phage inny                                                     | <i>Escherichia coli</i> | Olsen et al. 2020  |
| NC_052662          | Mt1B1_P17               | Escherichia phage Mt1B1_P17                                                | <i>Escherichia coli</i> | NA                 |
| CP022664           | CP022664                | Escherichia coli strain FORC 064 chromosome                                | Bacterial               | NA                 |
| NZ_CAJSKI010000035 | NZ_CAJSKI               | Escherichia coli isolate Fecal samples                                     | Bacterial               | NA                 |
| NZ_LBFX01000018    | YB2A06                  | Vibrio cholerae strain YB2A06                                              | Bacterial               | NA                 |
| CWPX01000013       | PLE7 <i>V. cholerae</i> | Vibrio cholerae genome assembly 4056_7#9, scaffold ERS013187SCcontig000013 | Bacterial               | NA                 |
| CP057957           | N/A                     | Escherichia coli strain RHB08-C21 chromosome                               | Bacterial               | AbuOun et al. 2021 |

<sup>a</sup>Phage names shortened for simplicity in figure and text.

<sup>b</sup>Abbreviation: NA, not applicable.

Table S3. Pfam domains used for gene neighborhood analysis

| <b>Family</b>            | <b>Pfam Domain(s)</b>                                                                                   |
|--------------------------|---------------------------------------------------------------------------------------------------------|
| Capsid                   | PF03864, PF05065, PF05357, PF07068                                                                      |
| Terminase                | PF03592,PF03237,PF04466,PF07471,PF11053,PF16677,PF17288,PF17289,PF05876,PF05944,PF06056,PF03354,PF05119 |
| Tape Measure             | PF05017, PF06120, PF06791, PF09718, PF10145, PF20155, PF16459, PF16460, PF16461,PF17388,PF19268         |
| Ribonucleotide Reductase | PF14597,PF00268,PF00317,PF02867,PF08343                                                                 |
| DNA Polymerase           | PF00476, PF02767                                                                                        |
| T5orf172                 | PF10544,PF13455                                                                                         |
| GIY-YIG                  | PF01541                                                                                                 |
| HNH-3                    | PF01381                                                                                                 |
| LAGLIDADG                | PF14528,PF03161,PF00961                                                                                 |
| CapR                     | Custom profile                                                                                          |
| IPA-HNH                  | Custom profile                                                                                          |
